# Supplementary material
Source: HighWire-hosted journal article supplement (https://jnm.snmjournals.org/highwire/filestream/109064/field_highwire_adjunct_files/0/263371_Supplemental_Data.pdf)
Supplement: 263371_Supplemental_Data.pdf [file 263371_Supplemental_Data.pdf]

## General Information

Analytical and preparative high-performance liquid chromatography (HPLC) was performed using Shimadzu gradient systems (Neufahrn, Germany) equipped with an SPD-20A UV/Vis detector. The columns for analytical (MultoKrom 100C18, 150×4.6 mm, 5 μm), radio-analytical (Multospher 100RP18, 125×4.6 mm, 5 μm) and preparative (MultoKrom 100C18, 250×20 mm, 5 μm) HPLC were purchased from CS Chromatographie Service (Langerwehe, Germany). Eluents for all HPLC operations were water (solvent A) and acetonitrile with 2 vol.% water (solvent B), both containing 0.1 vol.% trifluoroacetic acid (TFA). Radioactivity was detected via a HERM LB 500 NaI detector (Berthold Technologies, Bad Wildbad, Germany). Radio-thin layer chromatography (TLC) was carried out with a Scan-RAM detector (LabLogic Systems, Sheffield, United Kingdom). Electrospray ionization-mass spectra were acquired on an expression<sup>+</sup> CMS (Advion, Harlow, UK).

## Synthesis of PSMA Ligands

The uncomplexed radiohybrid ligands rhPSMA-7.1, -7.2, -7.3 and -7.4 were prepared by applying a mixed solid phase/solution phase synthetic strategy, according to the literature protocols (1). rhPSMA-10.1 and -10.2 were obtained in analogy to the rhPSMA-7 isomers, by substitution of the DOTA-GA chelator with DOTA. PSMA I&T was prepared according to the published procedure (2) and PSMA-617 was purchased from MedChemExpress LLC (Monmouth Junction, USA).

For complexation with non-radioactive lutetium for *in vitro* studies, a 2 mM solution of the PSMA inhibitor (1.0 eq.) in DMSO was combined with a 20 mM aqueous solution of LuCl<sub>3</sub> (2.5 eq.) and heated to 95°C for 30 min. Analytical data of the Lu-chelated PSMA ligands are summarized in the supporting information.

## Analytical data of Lu-complexed PSMA inhibitors:

**Lu-rhPSMA-7.1:** RP-HPLC (10 to 70% B in 15 min):  $t_R = 9.7$  min,  $K' = 3.85$ . Calculated monoisotopic mass (C<sub>63</sub>H<sub>96</sub>FLuN<sub>12</sub>O<sub>25</sub>Si): 1642.6; found:  $m/z = 1643.5$  [M+H]<sup>+</sup>, 822.5 [M+2H]<sup>2+</sup>.

**Lu-rhPSMA-7.2:** RP-HPLC (10 to 70% B in 15 min):  $t_R = 9.4$  min,  $K' = 3.70$ . Calculated monoisotopic mass (C<sub>63</sub>H<sub>96</sub>FLuN<sub>12</sub>O<sub>25</sub>Si): 1642.6; found:  $m/z = 1642.9$  [M+H]<sup>+</sup>, 822.0 [M+2H]<sup>2+</sup>.

**Lu-rhPSMA-7.3:** RP-HPLC (10 to 70% B in 15 min):  $t_R = 9.6$  min,  $K' = 3.80$ . Calculated monoisotopic mass (C<sub>63</sub>H<sub>96</sub>FLuN<sub>12</sub>O<sub>25</sub>Si): 1642.6; found:  $m/z = 1643.4$  [M+H]<sup>+</sup>, 822.3 [M+2H]<sup>2+</sup>.

**Lu-rhPSMA-7.4:** RP-HPLC (10 to 70% B in 15 min):  $t_R = 9.6$  min,  $K' = 3.80$ . Calculated monoisotopic mass (C<sub>63</sub>H<sub>96</sub>FLuN<sub>12</sub>O<sub>25</sub>Si): 1642.6; found:  $m/z = 1643.0$  [M+H]<sup>+</sup>, 822.3 [M+2H]<sup>2+</sup>.

**Lu-rhPSMA-10.1:** RP-HPLC (10 to 70% B in 15 min):  $t_R = 9.9$  min,  $K' = 3.95$ . Calculated monoisotopic mass ( $C_{60}H_{92}FLuN_{12}O_{23}Si$ ): 1570.6; found:  $m/z = 1571.8 [M+H]^+$ ,  $786.2 [M+2H]^{2+}$ .

**Lu-rhPSMA-10.2:** RP-HPLC (10 to 70% B in 15 min):  $t_R = 9.6$  min,  $K' = 3.80$ . Calculated monoisotopic mass ( $C_{60}H_{92}FLuN_{12}O_{23}Si$ ): 1570.6; found:  $m/z = 1571.9 [M+H]^+$ ,  $786.6 [M+2H]^{2+}$ .

**Lu-PSMA-I&T:** RP-HPLC (10 to 70% B in 15 min):  $t_R = 7.2$  min,  $K' = 3.32$ . Calculated monoisotopic mass ( $C_{63}H_{89}ILuN_{11}O_{23}$ ): 1669.5; found:  $m/z = 1670.5 [M+H]^+$ ,  $1113.8 [2M+3H]^{3+}$ .

**Lu-PSMA-617:** RP-HPLC (10 to 70% B in 15 min):  $t_R = 6.5$  min,  $K' = 2.82$ . Calculated monoisotopic mass ( $C_{49}H_{68}LuN_9O_{16}$ ): 1213.4; found:  $m/z = 1213.6 [M+H]^+$ ,  $607.5 [M+2H]^{2+}$ .

**Supplemental Table 1:** Radiochemical purity (RCP) of  $^{177}Lu$ -labeled rhPSMA isomers, determined by radio-TLC before lipophilicity studies, using either the citrate buffer system (0.1 M sodium citrate buffer on iTLC-SG chromatography paper) or acetate buffer system (1.0 M  $NH_4OAc$ /DMF buffer (1/1; v/v) on TLC Silica gel 60 F254 plates).

| $[^{177}Lu]Lu-$ | <b>citrate-TLC<br/>RCP</b> | <b>acetate-TLC<br/>RCP</b> |
|-----------------|----------------------------|----------------------------|
| rhPSMA-7.1      | 99.5%                      | 99.7%                      |
| rhPSMA-7.2      | 99.8%                      | 99.8%                      |
| rhPSMA-7.3      | 99.8%                      | 99.9%                      |
| rhPSMA-7.4      | 99.8%                      | 99.8%                      |
| rhPSMA-10.1     | 99.8%                      | 99.8%                      |
| rhPSMA-10.2     | 99.7%                      | 99.7%                      |

**Supplemental Table 2:** Binding affinities ( $IC_{50}$  [nM], 1 h, 4°C) of Lu-rhPSMA-7.1 to -7.4 (n=3), Lu-rhPSMA-10.1, -10.2 (n=3) and the references Lu-PSMA-617 and Lu-PSMA-I&T (n=3); PSMA-mediated internalization of [ $^{177}\text{Lu}$ ]Lu-rhPSMA-7.1 to -7.4 (n=3), [ $^{177}\text{Lu}$ ]Lu-rhPSMA-10.1, -10.2 (n=3) and the references [ $^{177}\text{Lu}$ ]Lu-PSMA-617 and [ $^{177}\text{Lu}$ ]Lu-PSMA I&T (n=3) by LNCaP cells (1 h, 37°C) as a percentage of the reference ligand ([ $^{125}\text{I}$ ]IBA)KuE); Lipophilicity of [ $^{177}\text{Lu}$ ]Lu-rhPSMA-7.1 to -7.4 (n=6), [ $^{177}\text{Lu}$ ]Lu-rhPSMA-10.1, -10.2 (n=6) and the references [ $^{177}\text{Lu}$ ]Lu-PSMA-617 and [ $^{177}\text{Lu}$ ]Lu-PSMA I&T (n=6), expressed as partition coefficient ( $\log D_{7.4}$ ) using the *n*-octanol/PBS (pH 7.4) distribution system ; Apparent molecular weight ( $MW_{\text{app}}$ ) of [ $^{177}\text{Lu}$ ]Lu-rhPSMA-7.1 to -7.4, [ $^{177}\text{Lu}$ ]Lu-rhPSMA-10.1, -10.2 and the references [ $^{177}\text{Lu}$ ]Lu-PSMA-617 and [ $^{177}\text{Lu}$ ]Lu-PSMA I&T, as determined by human serum albumin mediated size exclusion chromatography (AMSEC).

| Compound                   | [ $^{177}\text{Lu}$ ]Lu-rhPSMA-7.1 | [ $^{177}\text{Lu}$ ]Lu-rhPSMA-7.2 | [ $^{177}\text{Lu}$ ]Lu-rhPSMA-7.3 | [ $^{177}\text{Lu}$ ]Lu-rhPSMA-7.4 | [ $^{177}\text{Lu}$ ]Lu-rhPSMA- | [ $^{177}\text{Lu}$ ]Lu-rhPSMA- | [ $^{177}\text{Lu}$ ]Lu-PSMA-617 | [ $^{177}\text{Lu}$ ]Lu-PSMA I&T |
|----------------------------|------------------------------------|------------------------------------|------------------------------------|------------------------------------|---------------------------------|---------------------------------|----------------------------------|----------------------------------|
| $IC_{50}$ [nM]             | 3.11 ± 0.64                        | 2.88 ± 1.06                        | 3.29 ± 1.00                        | 3.06 ± 1.51                        | 2.76 ± 0.51                     | 3.61 ± 0.59                     | 3.27 ± 0.19                      | 4.17 ± 0.78                      |
| Internalization [%IBA-KuE] | 137.4 ± 5.8                        | 197.3 ± 15.0                       | 184.4 ± 11.8                       | 190.4 ± 10.5                       | 177.4 ± 14.6                    | 205.6 ± 8.3                     | 203.2 ± 10.1                     | 145.4 ± 13.8                     |
| $\log D_{7.4}$             | -4.27 ± 0.24                       | -4.25 ± 0.29                       | -4.12 ± 0.11                       | -4.10 ± 0.14                       | -3.78 ± 0.06                    | -3.83 ± 0.10                    | -4.1 ± 0.1                       | -4.1 ± 0.1                       |
| $MW_{\text{app}}$ [kDa]    | 26.3                               | 31.7                               | 30.4                               | 35.7                               | 25.1                            | 21.8                            | 13.7                             | 5.3                              |

**Supplemental Table 3:** Biodistribution of [<sup>177</sup>Lu]Lu-rhPSMA-7.1 to -7.4 at 24 h p.i. in male LNCaP tumor-bearing SCID mice. Data are expressed as a percentage of the injected dose per gram (% ID/g), mean ± standard deviation (SD; n=4).

| uptake in<br>% ID/g | [ <sup>177</sup> Lu]Lu-<br>rhPSMA-7.1<br>24 h p.i., n = 4 |               | [ <sup>177</sup> Lu]Lu-<br>rhPSMA-7.2<br>24 h p.i., n = 4 |               | [ <sup>177</sup> Lu]Lu-<br>rhPSMA-7.3<br>24 h p.i., n = 4 |               | [ <sup>177</sup> Lu]Lu-<br>rhPSMA-7.4<br>24 h p.i., n = 4 |               |
|---------------------|-----------------------------------------------------------|---------------|-----------------------------------------------------------|---------------|-----------------------------------------------------------|---------------|-----------------------------------------------------------|---------------|
|                     | mean                                                      | SD            | mean                                                      | SD            | mean                                                      | SD            | mean                                                      | SD            |
| <b>blood</b>        | <b>0.0023</b>                                             | <b>0.0006</b> | <b>0.0090</b>                                             | <b>0.0015</b> | <b>0.0032</b>                                             | <b>0.0007</b> | <b>0.0052</b>                                             | <b>0.0026</b> |
| heart               | 0.036                                                     | 0.009         | 0.032                                                     | 0.005         | 0.031                                                     | 0.009         | 0.032                                                     | 0.006         |
| lung                | 0.050                                                     | 0.006         | 0.049                                                     | 0.009         | 0.049                                                     | 0.011         | 0.056                                                     | 0.014         |
| <b>liver</b>        | <b>0.28</b>                                               | <b>0.06</b>   | <b>0.24</b>                                               | <b>0.06</b>   | <b>0.22</b>                                               | <b>0.04</b>   | <b>0.16</b>                                               | <b>0.03</b>   |
| spleen              | 0.24                                                      | 0.04          | 0.79                                                      | 0.13          | 0.73                                                      | 0.23          | 0.72                                                      | 0.29          |
| pancreas            | 0.019                                                     | 0.003         | 0.076                                                     | 0.071         | 0.025                                                     | 0.005         | 0.027                                                     | 0.006         |
| stomach             | 0.071                                                     | 0.018         | 0.246                                                     | 0.236         | 0.059                                                     | 0.028         | 0.068                                                     | 0.029         |
| intestine           | 0.15                                                      | 0.05          | 0.34                                                      | 0.31          | 0.13                                                      | 0.08          | 0.15                                                      | 0.07          |
| <b>kidney</b>       | <b>4.10</b>                                               | <b>0.81</b>   | <b>19.04</b>                                              | <b>4.45</b>   | <b>9.82</b>                                               | <b>2.74</b>   | <b>15.66</b>                                              | <b>8.92</b>   |
| adrenals            | 0.12                                                      | 0.04          | 0.61                                                      | 0.13          | 0.56                                                      | 0.22          | 0.34                                                      | 0.18          |
| muscle              | 0.011                                                     | 0.001         | 0.010                                                     | 0.002         | 0.009                                                     | 0.003         | 0.010                                                     | 0.003         |
| bone                | 0.030                                                     | 0.009         | 0.034                                                     | 0.008         | 0.048                                                     | 0.010         | 0.023                                                     | 0.009         |
| <b>tumor</b>        | <b>12.40</b>                                              | <b>1.27</b>   | <b>12.73</b>                                              | <b>2.76</b>   | <b>11.63</b>                                              | <b>2.24</b>   | <b>12.56</b>                                              | <b>3.52</b>   |
| parotid gl.         | 0.083                                                     | 0.020         | 0.114                                                     | 0.030         | 0.131                                                     | 0.042         | 0.111                                                     | 0.057         |
| submand. gl.        | 0.051                                                     | 0.004         | 0.072                                                     | 0.005         | 0.056                                                     | 0.010         | 0.075                                                     | 0.019         |

**Supplemental Table 4:** Biodistribution of [<sup>177</sup>Lu]Lu-rhPSMA-10.1, -10.2 and the references [<sup>177</sup>Lu]Lu-PSMA-617 and [<sup>177</sup>Lu]Lu-PSMA I&T at 24 h p.i. in male LNCaP tumor-bearing SCID mice. Data are expressed as a percentage of the injected dose per gram (% ID/g), mean ± standard deviation (SD; n=4-5). Values of [<sup>177</sup>Lu]Lu-PSMA I&T were taken from a previously published study by our group (3). N.d. not determined.

| uptake in<br>% ID/g | <b>[<sup>177</sup>Lu]Lu-<br/>rhPSMA-10.1<br/>24 h p.i., n = 5</b> |               | <b>[<sup>177</sup>Lu]Lu-<br/>rhPSMA-10.2<br/>24 h p.i., n = 4</b> |               | <b>[<sup>177</sup>Lu]Lu-<br/>PSMA-617<br/>24 h p.i., n = 4</b> |               | <b>[<sup>177</sup>Lu]Lu-<br/>PSMA-I&amp;T<br/>24 h p.i., n = 4</b> |               |
|---------------------|-------------------------------------------------------------------|---------------|-------------------------------------------------------------------|---------------|----------------------------------------------------------------|---------------|--------------------------------------------------------------------|---------------|
|                     | mean                                                              | SD            | mean                                                              | SD            | mean                                                           | SD            | mean                                                               | SD            |
| <b>blood</b>        | <b>0.0009</b>                                                     | <b>0.0001</b> | <b>0.0022</b>                                                     | <b>0.0008</b> | <b>0.0056</b>                                                  | <b>0.0026</b> | <b>0.0118</b>                                                      | <b>0.0064</b> |
| heart               | 0.017                                                             | 0.001         | 0.020                                                             | 0.004         | 0.012                                                          | 0.004         | 0.049                                                              | 0.034         |
| lung                | 0.032                                                             | 0.004         | 0.036                                                             | 0.007         | 0.039                                                          | 0.013         | 0.158                                                              | 0.029         |
| <b>liver</b>        | <b>0.18</b>                                                       | <b>0.06</b>   | <b>0.15</b>                                                       | <b>0.05</b>   | <b>0.12</b>                                                    | <b>0.06</b>   | <b>0.05</b>                                                        | <b>0.01</b>   |
| spleen              | 0.17                                                              | 0.03          | 0.53                                                              | 0.26          | 0.08                                                           | 0.01          | 1.94                                                               | 1.01          |
| pancreas            | 0.013                                                             | 0.002         | 0.021                                                             | 0.002         | 0.011                                                          | 0.004         | 0.048                                                              | 0.029         |
| stomach             | 0.056                                                             | 0.014         | 0.104                                                             | 0.069         | 0.020                                                          | 0.003         | 0.048                                                              | 0.021         |
| intestine           | 0.11                                                              | 0.05          | 0.24                                                              | 0.13          | 0.12                                                           | 0.08          | 0.12                                                               | 0.06          |
| <b>kidney</b>       | <b>1.97</b>                                                       | <b>0.78</b>   | <b>8.09</b>                                                       | <b>1.68</b>   | <b>1.44</b>                                                    | <b>0.42</b>   | <b>34.66</b>                                                       | <b>17.20</b>  |
| adrenals            | 0.06                                                              | 0.04          | 0.41                                                              | 0.17          | 0.19                                                           | 0.07          | 1.06                                                               | 0.24          |
| muscle              | 0.003                                                             | 0.002         | 0.007                                                             | 0.002         | 0.009                                                          | 0.002         | 0.010                                                              | 0.004         |
| bone                | 0.022                                                             | 0.008         | 0.020                                                             | 0.008         | 0.027                                                          | 0.017         | 0.014                                                              | 0.004         |
| <b>tumor</b>        | <b>9.82</b>                                                       | <b>0.30</b>   | <b>10.45</b>                                                      | <b>3.25</b>   | <b>7.46</b>                                                    | <b>0.90</b>   | <b>4.06</b>                                                        | <b>1.12</b>   |
| parotid gl.         | 0.041                                                             | 0.009         | 0.100                                                             | 0.017         | n.d.                                                           | n.d.          | n.d.                                                               | n.d.          |
| submand. gl.        | 0.037                                                             | 0.007         | 0.046                                                             | 0.009         | n.d.                                                           | n.d.          | n.d.                                                               | n.d.          |

**Supplemental Table 5:** Tumor-to-organ ratios of [<sup>177</sup>Lu]Lu-rhPSMA-7.1 to -7.4 at 24 h p.i. in male LNCaP tumor-bearing SCID mice. Mean ± standard deviation (SD; n=4). Tumor-to-organ ratios were calculated from individual mice and mean values were determined.

| tumor-to-organ ratio | <b>[<sup>177</sup>Lu]Lu-rhPSMA-7.1</b><br>24 h p.i., n = 4 |             | <b>[<sup>177</sup>Lu]Lu-rhPSMA-7.2</b><br>24 h p.i., n = 4 |            | <b>[<sup>177</sup>Lu]Lu-rhPSMA-7.3</b><br>24 h p.i., n = 4 |             | <b>[<sup>177</sup>Lu]Lu-rhPSMA-7.4</b><br>24 h p.i., n = 4 |            |
|----------------------|------------------------------------------------------------|-------------|------------------------------------------------------------|------------|------------------------------------------------------------|-------------|------------------------------------------------------------|------------|
|                      | mean                                                       | SD          | mean                                                       | SD         | mean                                                       | SD          | mean                                                       | SD         |
| <b>blood</b>         | <b>5971</b>                                                | <b>2358</b> | <b>1460</b>                                                | <b>495</b> | <b>3843</b>                                                | <b>1145</b> | <b>2570</b>                                                | <b>820</b> |
| heart                | 368                                                        | 122         | 409                                                        | 125        | 394                                                        | 82          | 387                                                        | 81         |
| lung                 | 252                                                        | 53          | 275                                                        | 113        | 239                                                        | 24          | 234                                                        | 87         |
| <b>liver</b>         | <b>47</b>                                                  | <b>13</b>   | <b>54</b>                                                  | <b>12</b>  | <b>54</b>                                                  | <b>2</b>    | <b>78</b>                                                  | <b>13</b>  |
| spleen               | 54                                                         | 13          | 16                                                         | 3          | 17                                                         | 3           | 19                                                         | 4          |
| pancreas             | 671                                                        | 211         | 285                                                        | 170        | 487                                                        | 133         | 489                                                        | 180        |
| stomach              | 191                                                        | 70          | 187                                                        | 210        | 262                                                        | 177         | 228                                                        | 135        |
| intestine            | 95                                                         | 40          | 150                                                        | 211        | 129                                                        | 86          | 104                                                        | 55         |
| <b>kidney</b>        | <b>3.2</b>                                                 | <b>0.9</b>  | <b>0.7</b>                                                 | <b>0.2</b> | <b>1.2</b>                                                 | <b>0.3</b>  | <b>1.0</b>                                                 | <b>0.5</b> |
| adrenals             | 119                                                        | 54          | 21                                                         | 1          | 23                                                         | 7           | 43                                                         | 14         |
| muscle               | 1167                                                       | 214         | 1453                                                       | 623        | 1454                                                       | 601         | 1269                                                       | 92         |
| bone                 | 453                                                        | 190         | 384                                                        | 66         | 264                                                        | 111         | 616                                                        | 309        |
| parotid gl.          | 163                                                        | 69          | 112                                                        | 14         | 93                                                         | 21          | 99                                                         | 13         |
| submand. gl.         | 244                                                        | 43          | 177                                                        | 40         | 207                                                        | 27          | 169                                                        | 33         |

**Supplemental Table 6:** Tumor-to-organ ratios [<sup>177</sup>Lu]Lu-rhPSMA-10.1, -10.2 and the references [<sup>177</sup>Lu]Lu-PSMA-617 and [<sup>177</sup>Lu]Lu-PSMA I&T at 24 h p.i. in male LNCaP tumor-bearing SCID mice. Mean ± standard deviation (SD; n=4-5). Values of [<sup>177</sup>Lu]PSMA I&T were taken from a previously published study by our group (3). Tumor-to-organ ratios were calculated from individual mice and mean values were determined.

| tumor-to-organ ratio | <b>[<sup>177</sup>Lu]Lu-rhPSMA-10.1</b><br>24 h p.i., n = 5 |             | <b>[<sup>177</sup>Lu]Lu-rhPSMA-10.2</b><br>24 h p.i., n = 4 |             | <b>[<sup>177</sup>Lu]Lu-PSMA-617</b><br>24 h p.i., n = 4 |            | <b>[<sup>177</sup>Lu]Lu-PSMA-I&amp;T</b><br>24 h p.i., n = 4 |             |
|----------------------|-------------------------------------------------------------|-------------|-------------------------------------------------------------|-------------|----------------------------------------------------------|------------|--------------------------------------------------------------|-------------|
|                      | mean                                                        | SD          | mean                                                        | SD          | mean                                                     | SD         | mean                                                         | SD          |
| <b>blood</b>         | <b>11498</b>                                                | <b>1953</b> | <b>6125</b>                                                 | <b>4185</b> | <b>1424</b>                                              | <b>455</b> | <b>408</b>                                                   | <b>209</b>  |
| heart                | 568                                                         | 52          | 585                                                         | 321         | 704                                                      | 270        | 128                                                          | 77          |
| lung                 | 313                                                         | 33          | 295                                                         | 100         | 210                                                      | 74         | 26                                                           | 9           |
| <b>liver</b>         | <b>57</b>                                                   | <b>13</b>   | <b>69</b>                                                   | <b>17</b>   | <b>91</b>                                                | <b>73</b>  | <b>86</b>                                                    | <b>31</b>   |
| spleen               | 58                                                          | 11          | 27                                                          | 19          | 93                                                       | 22         | 3.0                                                          | 2.0         |
| pancreas             | 774                                                         | 189         | 511                                                         | 198         | 799                                                      | 293        | 144                                                          | 115         |
| stomach              | 187                                                         | 47          | 221                                                         | 231         | 376                                                      | 65         | 105                                                          | 60          |
| intestine            | 115                                                         | 75          | 111                                                         | 162         | 90                                                       | 50         | 49                                                           | 33          |
| <b>kidney</b>        | <b>5.7</b>                                                  | <b>2.0</b>  | <b>1.4</b>                                                  | <b>0.6</b>  | <b>5.9</b>                                               | <b>3.0</b> | <b>0.15</b>                                                  | <b>0.08</b> |
| adrenals             | 171                                                         | 111         | 33                                                          | 22          | 44                                                       | 15         | 4.1                                                          | 1.5         |
| muscle               | 2441                                                        | 373         | 1798                                                        | 792         | 855                                                      | 279        | 496                                                          | 242         |
| bone                 | 595                                                         | 462         | 589                                                         | 280         | 472                                                      | 378        | 315                                                          | 144         |
| parotid gl.          | 250                                                         | 64          | 107                                                         | 37          | n.d.                                                     | n.d.       | n.d.                                                         | n.d.        |
| submand. gl.         | 275                                                         | 49          | 223                                                         | 45          | n.d.                                                     | n.d.       | n.d.                                                         | n.d.        |

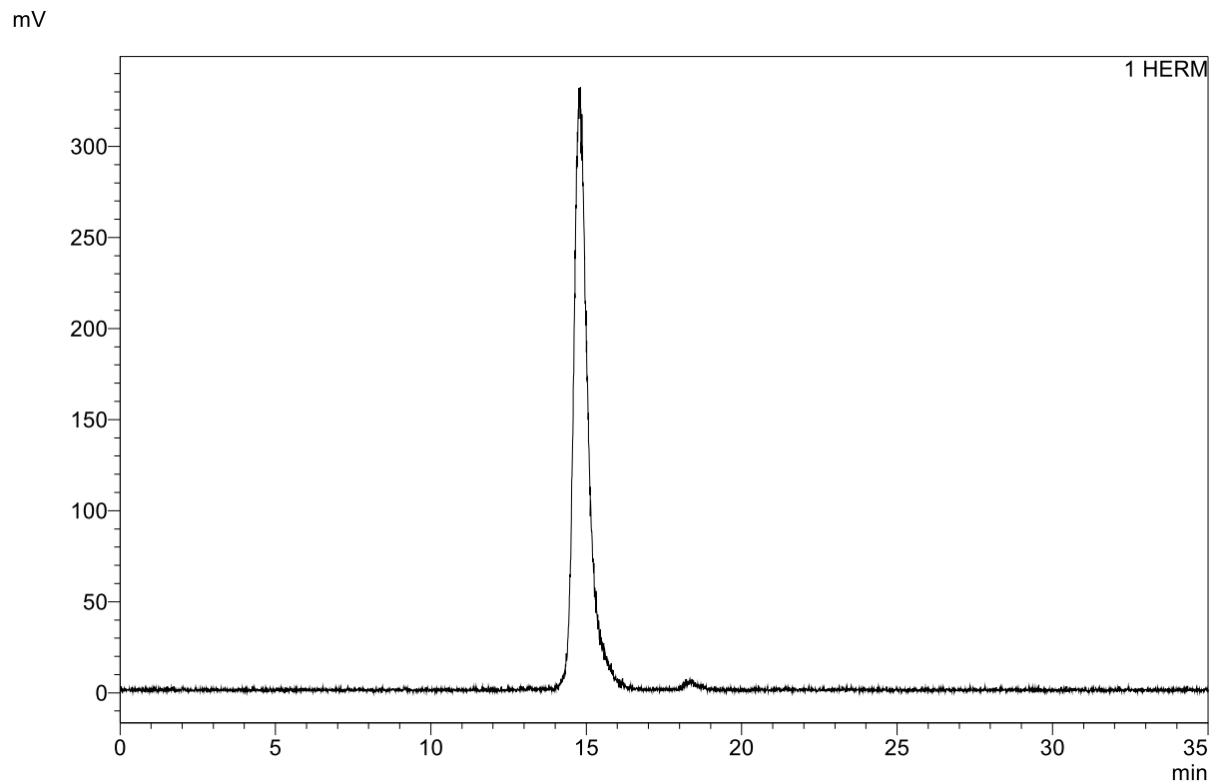

**Supplemental Figure 1:** Exemplary radio-chromatogram of [<sup>177</sup>Lu]Lu-rhPSMA-7.3 in the AMSEC experiment. The retention time of 14.8 min measured in this particular experiment correlates with an AMW of 30.3 kDa (AMW of 30.4 ± 0.5 kDa (mean ± SD) for n = 10 independent measurements).



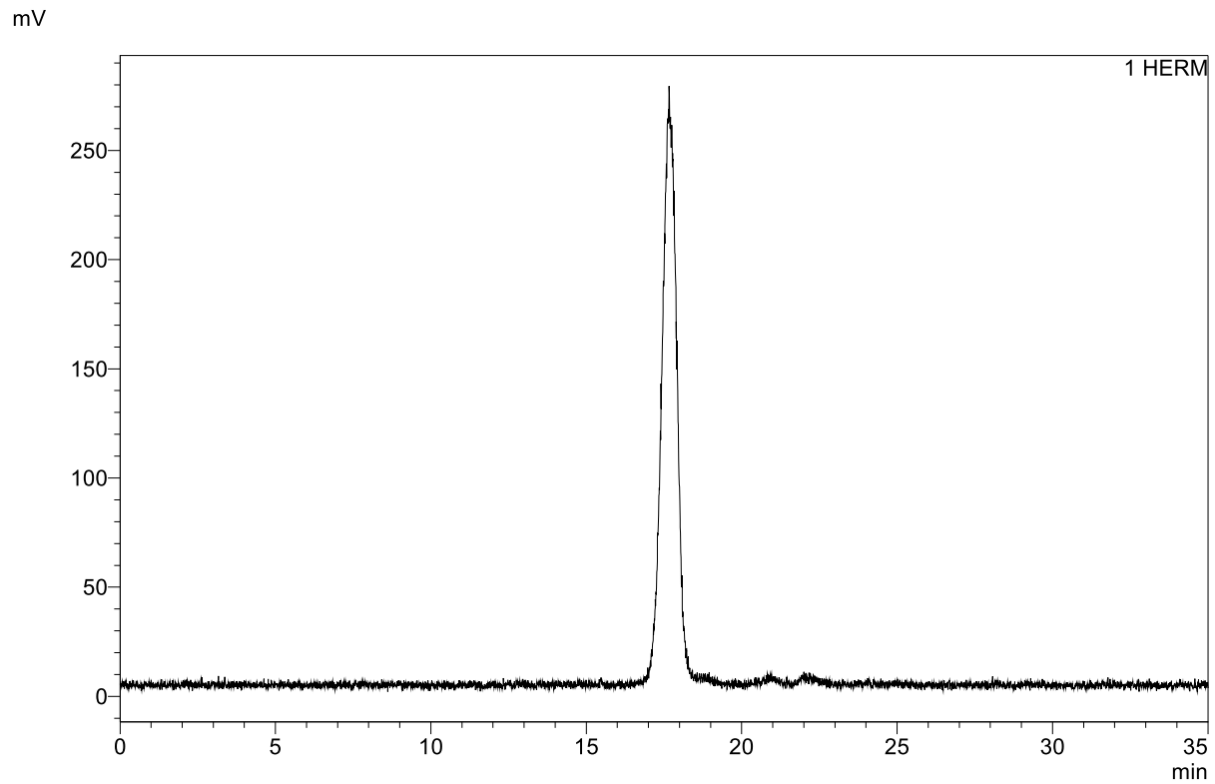

**Supplemental Figure 2:** Radio-chromatogram of [ $^{177}\text{Lu}$ ]Lu-PSMA-617 in the AMSEC experiment. The retention time of 17.7 min measured in this particular experiment correlates with an AMW of 13.7 kDa.

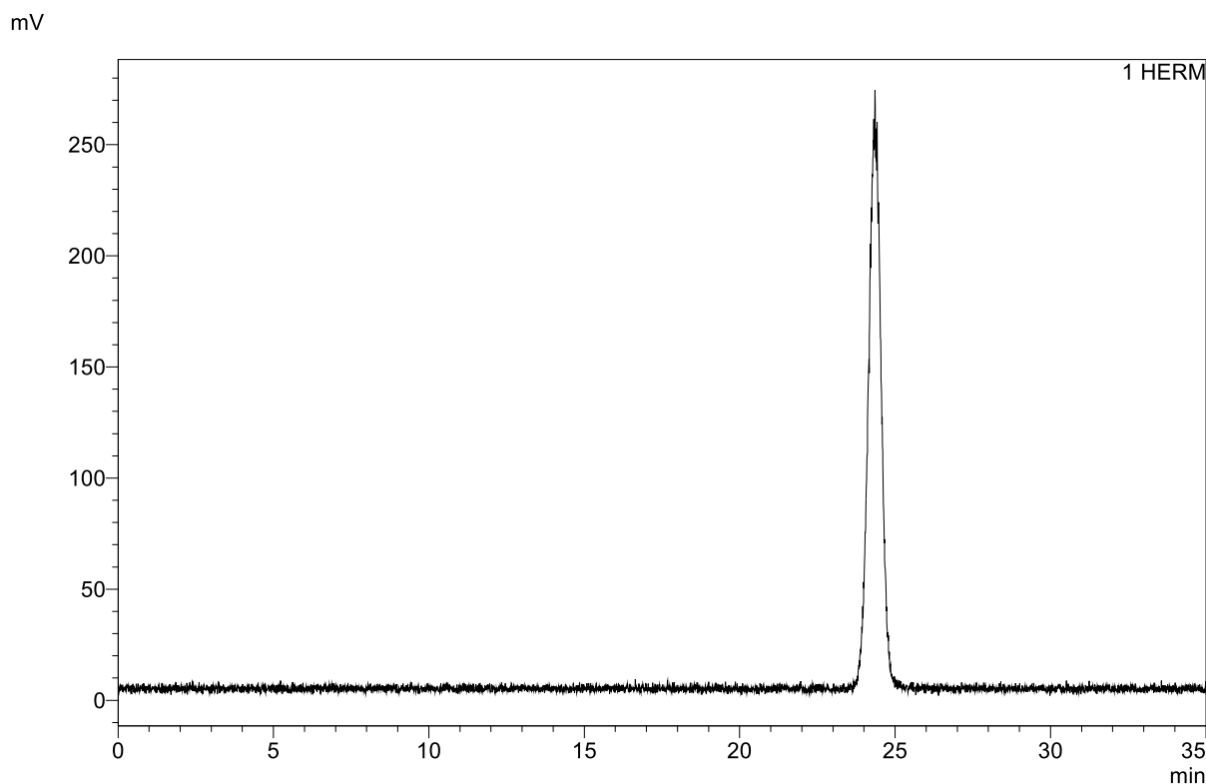

**Supplemental Figure 3:** Radio-chromatogram of [ $^{18}\text{F}$ ]fluoride in the AMSEC experiment. Due to the absence of interaction of fluoride with HSA, [ $^{18}\text{F}$ ]fluoride is eluted after 24.4 min, as expected for a small inorganic ion, and the corresponding AMW of 2.1 kDa lies below the fractionation range of the gel filtration column (70 – 3 kDa).

## References

1. Wurzer A, Parzinger M, Konrad M, et al. Preclinical comparison of four [(18)F, (nat)Ga]rhPSMA-7 isomers: influence of the stereoconfiguration on pharmacokinetics. *EJNMMI Res.* 2020;10:149.
2. Weineisen M, Schottelius M, Simecek J, et al.  $^{68}\text{Ga}$ - and  $^{177}\text{Lu}$ -Labeled PSMA I&T: Optimization of a PSMA-Targeted Theranostic Concept and First Proof-of-Concept Human Studies. *J Nucl Med.* 2015;56:1169-1176.
3. Wirtz M, Schmidt A, Schottelius M, et al. Synthesis and in vitro and in vivo evaluation of urea-based PSMA inhibitors with increased lipophilicity. *EJNMMI Res.* 2018;8:84.
